# Supplementary material
Source: Research Square preprint supplement (doi:10.21203/rs.3.rs-9579877/v2)
Supplement: Supplementary file 1 [file 8053066e8fd6d46ddbee7fcf.docx]

**Assessing intergenerational and environmentally dependent inbreeding depression in a wild bird population**

**Supplementary information**

Table S1. MCMC animal models summary

| **Fitness measure** | **FROH pmean** | **FROH pMCMC** | **GRM prop. variance** |
| --- | --- | --- | --- |
| FYS | 0.171 | 0.510 | <0.001 |
| Lifespan | -7.93 | ***<0.001*** | <0.001 |
| LRS | -8.74 | ***<0.001*** | <0.001 |

Table S1. Summary of MCMCglmm animal models of the effect of individual inbreeding coefficients on first-year survival (FYS), lifespan, and lifetime reproductive success (LRS, number of offspring survived to first-year), with the proportion of variance explained by the genomic relatedness matrix.

Table S2. Sex differences in fitness measures

| **Fitness measure** | **Mean (males)** | **SD (males)** | **Mean (females)** | **SD (females)** | **Wilcox test sig value** |
| --- | --- | --- | --- | --- | --- |
| FYS | 0.448 | 0.498 | 0.459 | 0.499 | W = 134746, p-value = 0.7144 |
| Lifespan | 4.6 | 3.678 | 4.932 | 3.81 | W = 139520, p-value = 0.1858 |
| LRS | 2.38 | 3.55 | 2.33 | 3.043 | W = 137301, p-value = 0.375 |

Table S2. Comparison of means across males and females for first-year survival (FYS), lifespan, and lifetime reproductive success (LRS, number of offspring survived to first-year), in the Cousin island population of Seychelles warblers 1997 – 2023.

Table S3. GLMM of Parental FROH on reproductive count, split by sex.

| **Model** | 1. **Females n = 246** | | | | 1. **Males n =253** | | | |
| --- | --- | --- | --- | --- | --- | --- | --- | --- |
| **Fixed Effects** | **Beta** | **SE** | **Stat** | **p-value** | **Beta** | **SE** | **Stat.** | **p-value** |
| (Intercept) | 6.73 | 1.35 | 4.98 | <0.001 | 4.57 | 1.17 | 3.89 | <0.001 |
| Individual FROH | -1.28 | 0.853 | -1.5 | 0.133 | 0.074 | 0.613 | 0.12 | 0.904 |
| Social Father FROH | -0.99 | 0.997 | -0.993 | 0.321 | -0.29 | 0.661 | -0.438 | 0.661 |
| Genetic Father FROH | -0.011 | 1.09 | -0.01 | 0.992 | 0.077 | 0.737 | 0.104 | 0.917 |
| Mother FROH | -1.09 | 0.8 | -1.37 | 0.171 | 0.463 | 0.555 | 0.834 | 0.405 |
| Mean annual rainfall over lifespan | 1.35 | 1.03 | 1.31 | 0.19 | 0.015 | 0.618 | 0.024 | 0.981 |
| Mean variance in annual rainfall over lifespan | -0.428 | 0.723 | -0.592 | 0.554 | -1.14 | 0.722 | -1.58 | 0.115 |
| Presence of sibling in nest | 0.812 | 0.951 | 0.854 | 0.393 | 2.15 | 0.953 | 2.26 | 0.024 |
| Hatch year | 0.978 | 0.946 | 1.03 | 0.301 | 1.64 | 0.703 | 2.34 | 0.019 |
| Lifespan | -2.4 | 0.521 | -4.61 | ***<0.001*** | -1.91 | 0.528 | -3.62 | ***<0.001*** |

Table S3. Model of the effect of parental and individual inbreeding coefficients (FROH) on whether individuals reproduce or not (structural zero component of zero inflated Poisson GLMM) in the Cousin Island population of Seychelles warblers, 1997 – 2023.

Table S4. EPP model

| **Model** | 1. **First-year Survival** | | | | 1. **Lifespan** | | | | 1. **Reproduction 0/1** | | | | 1. **Reproduction Count** | | | |
| --- | --- | --- | --- | --- | --- | --- | --- | --- | --- | --- | --- | --- | --- | --- | --- | --- |
| **Fixed Effects** | **log(OR)** | **SE** | **Stat.** | **p-value** | **Beta** | **SE** | **Stat.** | **p-value** | **Beta** | **SE** | **Stat.** | **p-value** | **Beta** | **SE** | **Stat.** | **p-value** |
| (Intercept) | -0.133 | 0.298 | -0.445 | 0.656 | 1.22 | 0.24 | 5.07 | <0.001 | -11.5 | 6.46 | -1.78 | 0.075 | 0.766 | 0.092 | 8.35 | <0.001 |
| Individual FROH | -0.047 | 0.3 | -0.157 | 0.875 | -0.266 | 0.107 | -2.48 | ***0.013*** | -2.89 | 2.2 | -1.31 | 0.19 | -0.122 | 0.112 | -1.09 | 0.277 |
| Social Father FROH | 0.596 | 0.304 | 1.96 | 0.05 | 0.068 | 0.106 | 0.642 | 0.521 | -0.592 | 0.97 | -0.61 | 0.542 | 0.002 | 0.125 | 0.016 | 0.987 |
| Genetic Father FROH | -0.156 | 0.304 | -0.514 | 0.607 | 0.183 | 0.125 | 1.47 | 0.142 | 1.01 | 1.67 | 0.605 | 0.545 | 0.121 | 0.109 | 1.1 | 0.27 |
| Mother FROH | -0.133 | 0.298 | -0.445 | 0.656 | 0.046 | 0.121 | 0.376 | 0.707 | -3.96 | 2.57 | -1.54 | 0.123 | -0.077 | 0.116 | -0.666 | 0.505 |
| Sex | -0.693 | 0.295 | -2.34 | ***0.019*** | 0.109 | 0.1 | 1.09 | 0.276 |  |  |  |  |  |  |  |  |
| Helpers in natal territory – 1 | -0.047 | 0.41 | -0.115 | 0.908 | 0.382 | 0.164 | 2.32 | ***0.02*** |  |  |  |  |  |  |  |  |
| 2 | 15 | 883 | 0.017 | 0.986 | 0.112 | 0.738 | 0.151 | 0.88 |  |  |  |  |  |  |  |  |
| 3 |  |  |  |  |  |  |  |  |  |  |  |  |  |  |  |  |
| Annual rainfall in hatch year | 0.188 | 0.291 | 0.648 | 0.517 |  |  |  |  |  |  |  |  |  |  |  |  |
| Variance in rainfall in hatch year | 0.126 | 0.298 | 0.423 | 0.672 |  |  |  |  |  |  |  |  |  |  |  |  |
| Mean annual rainfall over lifespan |  |  |  |  | -0.295 | 0.125 | -2.36 | 0.018 |  |  |  |  |  |  |  |  |
| Mean variance in annual rainfall over lifespan |  |  |  |  | 0.44 | 0.123 | 3.58 | ***<0.001*** |  |  |  |  |  |  |  |  |
| Presence of sibling in nest | -0.239 | 0.378 | -0.632 | 0.527 | -0.013 | 0.134 | -0.097 | 0.923 |  |  |  |  |  |  |  |  |
| Natal group size | -0.027 | 0.32 | -0.085 | 0.932 | -0.018 | 0.073 | -0.242 | 0.809 |  |  |  |  |  |  |  |  |
| Hatch year |  |  |  |  | -0.651 | 0.135 | -4.82 | ***<0.001*** |  |  |  |  |  |  |  |  |
| Lifespan |  |  |  |  |  |  |  |  | -46 | 24.7 | -1.86 | 0.062 | 1.28 | 0.118 | 10.9 | <0.001 |
| **Random effects** |  | | **Variance** | **Std. Dev.** |  | | **Variance** | **Std. Dev.** |  | | **Variance** | **Std. Dev.** |  |  | **Variance** | **Std. Dev.** |
| Mum |  |  |  |  |  |  | 0.1649 | 0.4060 |  |  | 0.6679 | 0.8172 |  |  | 0.08667 | 0.2944 |
| Dad |  |  |  |  |  |  | 0.1612 | 0.4015 |  |  |  |  |  |  |  |  |

Table S4. Model results investigating relationship between parental inbreeding coefficients (FROH) and a) first-year survival (FYS), binomial GLMM; b) lifespan, count of years survived, Poisson GLMM; c) reproduction 0/1 (whether or not a bird reproduced at all, zero-inflated component of Poisson GLMM; d) reproduction count (total number of offspring that survived to one year), conditional component of Poisson ZI -GLMM, in the Cousin Island population of Seychelles warblers that are the result of extra pair paternity ,1997-2023 (n =204).

Figure S1


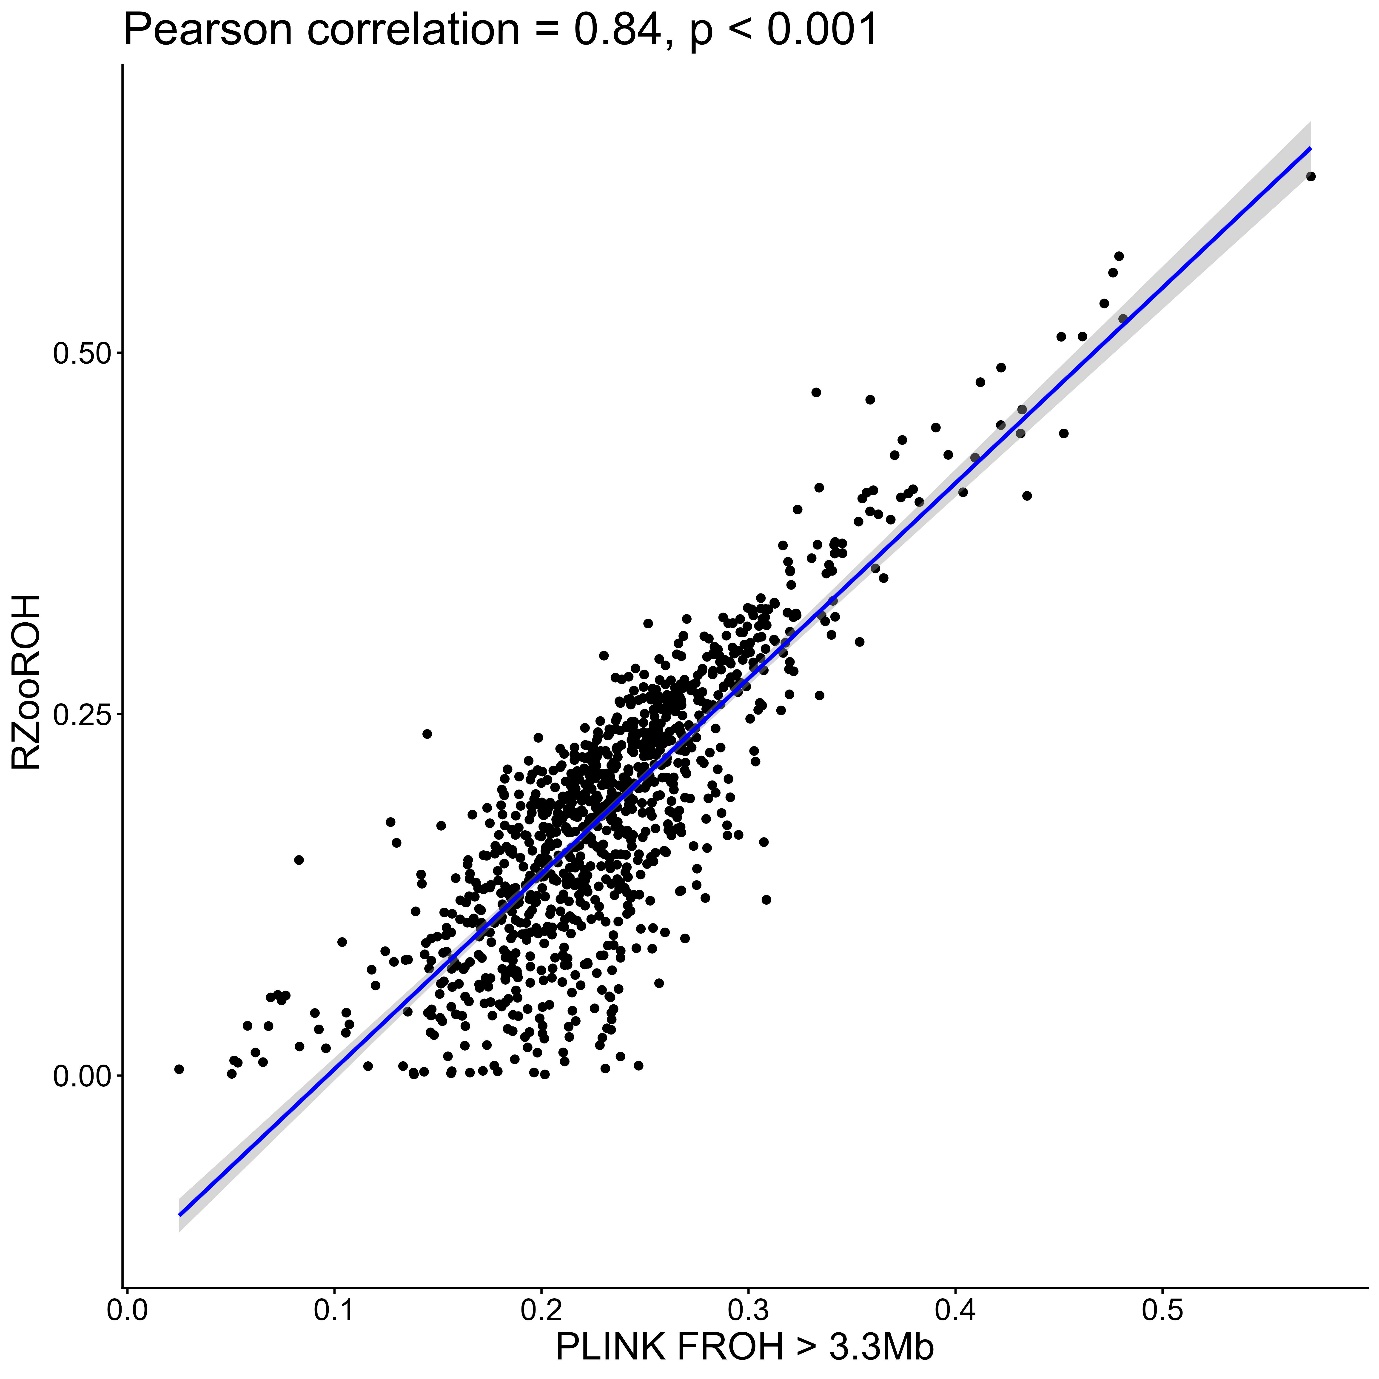


Figure S1

Comparison of FROH calculation methods. PLINK includes homozygous segments longer than 3.3Mb, while RZooROH classes segments that are homozygous by descent from 10 generations ago according to a rules based model. Dots are individual genomes of Seychelles warblers on Cousin Island 1997-2023 (n = 1019), the line is a linear model with 95% CI shading.
